# Supplementary material for: German recommendations for physical activity and physical activity promotion in adults with noncommunicable diseases
Source: PubMed Central journal article supplement (PMC7003325; doi:10.1186/s12966-020-0919-x), 2020-02-05
Supplement: 12966_2020_919_MOESM2_ESM.pdf [file 12966_2020_919_MOESM2_ESM.pdf]

**Additional file 2.** Quality checklist for the systematic reviews of reviews regarding the effectiveness/efficacy of PA promoting interventions.

| Criterion                                                                                                                                                  | Explanation                                                                                                                                                                                                      | Meta-Analysis                     | Review           |
|------------------------------------------------------------------------------------------------------------------------------------------------------------|------------------------------------------------------------------------------------------------------------------------------------------------------------------------------------------------------------------|-----------------------------------|------------------|
| Search terms and links of the search terms are stated explicitly (1).                                                                                      | Without this information the study is not transparent.                                                                                                                                                           | Yes                               | Yes              |
| It is stated which databases were searched (1).                                                                                                            | Without this information the study is not transparent.                                                                                                                                                           | Yes                               | Yes              |
| There is a diagram for included/excluded studies (1).                                                                                                      | This is considered as standard.                                                                                                                                                                                  | Yes                               | Yes              |
| The included studies are shown in tables (min. design, measures, outcomes) (1).                                                                            | This is considered as standard.                                                                                                                                                                                  | Yes                               | Yes              |
| There are estimations of the size/effects of different bias factors (1).                                                                                   | This is considered as standard.                                                                                                                                                                                  | Yes                               | Yes              |
| The problem of dependent measurements in the aggregation is discussed or dealt with (by exclusion or by statistical treatment of the dependencies) (2, 3). | Dependent measurements in studies lead to an overestimation of effects. As a minimum, this problem should be addressed. Methods for aggregating dependent measurements are on the market but are not used often. | Yes                               | When appropriate |
| Effect sizes and not only ordinal assessments of primary study results are reported (3).                                                                   | For meta-analyses unacceptable. However, for many reviews an averaged effect size can be reported (but not always).                                                                                              | Yes                               | When appropriate |
| Furthermore, (only or mainly) effect sizes without a statistical bias are reported (Hedges'g or log-OR) (3).                                               | Changes in percentage values show – depending on the baseline value – a bias. Because of that, summaries of unbiased mean values are preferable. For reviews, this depends on the data availability.             | Yes                               | When appropriate |
| More than 5 primary studies per analysis are reported (except in subgroup-analyses, see below) (3).                                                        | For 5 or less studies a summary depends strongly on the single studie. These reviews/meta-analysis are less useful.                                                                                              | Yes                               | Yes              |
| An analysis of the publication bias was conducted (e.g. funnel plot or variance analyses) (3, 4).                                                          | This is a standard for the estimation of the publication bias in meta-analyses.                                                                                                                                  | Yes                               | No               |
| Forest plots are reported (3).                                                                                                                             | This is a standard in meta-analyses. In reviews forest plots should be reported when appropriate data are available.                                                                                             | Yes                               | When appropriate |
| A check of the study heterogeneity was conducted (I-square and p-value) (3).                                                                               | This is a standard in meta-analyses. In reviews this should be discussed at least regarding the existence of heterogeneity.                                                                                      | Yes                               | When appropriate |
| Heterogeneous results are not only reported, but also discussed (3).                                                                                       | This is a standard in meta-analyses. In reviews this should be discussed at least regarding the existence of heterogeneity.                                                                                      | Conditionally (I <sup>2</sup> =1) | When appropriate |
| For clarifying heterogeneous results, meta-regressions or subgroup-analyses are conducted (3).                                                             | This is a standard in meta-analyses. Not applicable for reviews.                                                                                                                                                 | Conditionally (I <sup>2</sup> =1) | When appropriate |
| It is evident that the results are/were not only caused by one/a few big study/-ies (3).                                                                   | This should be checked both in meta-analyses and in reviews.                                                                                                                                                     | Yes                               | Yes              |
| Very small but significant effects ( $ g  < 0,10$ ; $ LOR  < 0,10$ ) are discussed regarding their relevance (1).                                          | Such results are possible in meta-analyses. It is a problem that both model violations and dominant studies result in such effects. A discussion is essential. Only reporting „significances“ is not helpful.    | Yes                               | No               |
| Insignificant or very small but heterogeneous effects are analysed by using sensitivity analyses, meta-regressions or subgroup-analyses (1).               | This should be done in meta-analyses.                                                                                                                                                                            | Yes                               | No               |

**References**

- Higgins JP, Green S. Cochrane Handbook for Systematic Reviews of Interventions. Version 5.1.0 [updated March 2011].
- Hedges LV, Tipton E, Johnson MC. Robust variance estimation in meta-regression with dependent effect size estimates. *Res Synth Methods*. 2010;1(1):39-65.
- Borenstein M, Hedges LV, Higgins JPT, Rothstein HR. *Introduction to Meta-Analysis*. 2009. Wiley. doi:10.1002/9780470743386
- Sterne JA, Egger M, Smith GD. Systematic reviews in health care: investigating and dealing with publication and other biases in meta-analysis. *BMJ*. 2001;323(7304):101-5.
