# Supplementary material for: German recommendations for physical activity and physical activity promotion in adults with noncommunicable diseases
Source: PubMed Central journal article supplement (PMC7003325; doi:10.1186/s12966-020-0919-x), 2020-02-05
Supplement: 12966_2020_919_MOESM5_ESM.pdf [file 12966_2020_919_MOESM5_ESM.pdf]

**Additional file 5.** Quality criteria for the conceptualization, implementation and evaluation of PA promoting interventions.

| <b>A) Quality of conceptualization</b> |                                                                                                                                                                                                                                                                                                                                                                                 |
|----------------------------------------|---------------------------------------------------------------------------------------------------------------------------------------------------------------------------------------------------------------------------------------------------------------------------------------------------------------------------------------------------------------------------------|
| (1)                                    | <b>Theoretical foundation</b><br>- Scientific theories of health-related physical activity research<br>- Conceptual framework of health promotion (principles, fields of action)                                                                                                                                                                                                |
| (2)                                    | <b>Multidimensionality</b><br>- Behavioral and environmental components<br>- Interaction of the components (integrative approach)                                                                                                                                                                                                                                               |
| (3)                                    | <b>Relation to context</b><br>- Individual and social factors<br>- Environmental and policy factors                                                                                                                                                                                                                                                                             |
| (4)                                    | <b>Relation to target group</b><br>- Identification of the target group and its special characteristics<br>- Specification of needs and strengths of the target group                                                                                                                                                                                                           |
| (5)                                    | <b>Involvement of different stakeholders</b><br>- Participation of the target group<br>- Participation of relevant professional groups and decision-makers                                                                                                                                                                                                                      |
| (6)                                    | <b>Specification of goals and target behavior</b>                                                                                                                                                                                                                                                                                                                               |
| (7)                                    | <b>Differentiated planning of the content-related and organizational process</b><br>- Definition and justification of the content and methods of the intervention<br>- Specification of the project plan and temporal structure<br>- Specification of intervention components, frequency, intensity and duration<br>- Detailed description of the approach (manuals, protocols) |
| <b>B) Quality of implementation</b>    |                                                                                                                                                                                                                                                                                                                                                                                 |
| (8)                                    | <b>Involvement of different stakeholders</b><br>- Target group(s) of the intervention<br>- Supporter / "social catalysts" (e.g. family)<br>- Professional groups (e.g. providers in the field of preventive medicine, decision maker)                                                                                                                                           |
| (9)                                    | <b>Empowerment of stakeholders / capacity development of organizations</b><br>- Qualification/training<br>- Professional support                                                                                                                                                                                                                                                |
| (10)                                   | <b>Resources</b><br>- Finances and time<br>- Infrastructures<br>- Quantity and quality of the involved staff<br>- Organizational/administrative commitment                                                                                                                                                                                                                      |
| (11)                                   | <b>Networking/cooperation/partnership</b><br>- Collaborative coordination of involved stakeholders/organizations<br>- Intersectoral alliances                                                                                                                                                                                                                                   |
| (12)                                   | <b>Consistence and adjustment</b><br>- "Program loyalty"<br>- Compatibility<br>- Feasibility<br>- Adjustment to the implementation context                                                                                                                                                                                                                                      |
| (13)                                   | <b>Communication</b><br>- Effective mechanisms for internal and external communication<br>- Transparency and openness                                                                                                                                                                                                                                                           |
| (14)                                   | <b>Sustainability</b><br>- Structural entrenchment<br>- Permanent takeover by involved stakeholders/community<br>- Continuation as an organizational routine                                                                                                                                                                                                                    |
| <b>C) Quality of evaluation</b>        |                                                                                                                                                                                                                                                                                                                                                                                 |
| (15)                                   | <b>Documentation and process evaluation</b>                                                                                                                                                                                                                                                                                                                                     |
| (16)                                   | <b>Evaluation of target group reach</b><br>- Inclusion regarding age, gender, health status<br>- Cultural and social inclusion                                                                                                                                                                                                                                                  |
| (17)                                   | <b>Outcome evaluation</b><br>- Valid, reliable and sensitive methods/instruments<br>- Specified regarding strength, sustainability and generalizability of the effects<br>- Specified regarding health relevance<br>- Specified regarding negative effects                                                                                                                      |
| (18)                                   | <b>Determine the cost/benefit relation</b><br>- Costs in relation to behavior change<br>- Costs in relation to health benefits                                                                                                                                                                                                                                                  |
